# Supplementary material for: Development of spray pyrolysis-synthesised Bi2O3 thin films for photocatalytic applications
Source: Royal Society of Chemistry journal article supplement (doi:10.1039/d4ra02907k), 2024-01-01
Supplement: d4ra02907k1.pdf [file d4ra02907k1.pdf]

## Supplementary material for

### Development of spray pyrolysis-synthesised Bi<sub>2</sub>O<sub>3</sub> thin films for photocatalytic applications

Jekaterina Sydorenko <sup>\*a</sup>, Malle Krunka <sup>a</sup>, Atanas Katerski <sup>a</sup>, Raitis Grzibovskis <sup>b</sup>, Aivars Vembris <sup>b</sup>, Arvo Mere <sup>a</sup>, Nicolae Spalatu <sup>a</sup> and Ilona Oja Acik <sup>a</sup>

<sup>a</sup> Laboratory for Thin Film Energy Materials, Department of Materials and Environmental Technology, Tallinn University of Technology, Ehitajate tee 5, 19086 Tallinn, Estonia.

<sup>b</sup> Institute of Solid State Physics, University of Latvia, Kengaraga Str. 8, Riga LV 1063, Latvia.

\* Corresponding authors: Jekaterina Sydorenko email: jekaterina.spiridono@taltech.ee, tel +372 6203369.

**Table S1** Comparative table of photocatalytic activity of Bi<sub>2</sub>O<sub>3</sub> films prepared by different deposition methods

| Deposition method     | Precursor                                            | Preparation temperature                                   | Composition/Phase                                                                                         | Thickness, nm | Band gap, (eV) | Photocatalytic activity                      | Ref          |
|-----------------------|------------------------------------------------------|-----------------------------------------------------------|-----------------------------------------------------------------------------------------------------------|---------------|----------------|----------------------------------------------|--------------|
| Sol-gel, spin coating | Bi(NO <sub>3</sub> ) <sub>3</sub> ·5H <sub>2</sub> O | Calcined at 450 °C                                        | β-Bi <sub>2</sub> O <sub>3</sub>                                                                          | 200           | 3.2            | ca 2 ppm of Rhodamine B in 300 min UV-C      | <sup>1</sup> |
| Sol-gel, dip coating  | Bi(NO <sub>3</sub> ) <sub>3</sub> ·5H <sub>2</sub> O | Preliminary heating at 371 °C and annealing at 400-700 °C | β-Bi <sub>2</sub> O <sub>3</sub> , Bi <sub>2</sub> O <sub>2.33</sub> and Bi <sub>2</sub> SiO <sub>5</sub> | NR            | 3.63 - 3.74    | ca 9.5 ppm of MO in 2 h under UV.            | <sup>2</sup> |
| Sol-gel, dip coating  | Bi(NO <sub>3</sub> ) <sub>3</sub> ·5H <sub>2</sub> O | Pre-heated at 390 °C and annealed at 450-600 °C           | α-Bi <sub>2</sub> O <sub>3</sub> and β-Bi <sub>2</sub> O <sub>3</sub>                                     | 120           | NR             | ca 10 ppm Rhodamine B in 210 min under UV-A. | <sup>3</sup> |
| Sol-gel, dip coating  | Bi(NO <sub>3</sub> ) <sub>3</sub> ·5H <sub>2</sub> O | Heating at 250 °C for                                     | β-Bi <sub>2</sub> O <sub>3</sub>                                                                          | 60            | 3.4            | ca 5 ppb                                     | <sup>4</sup> |

|                                   |                                                                                                      |                                                                                       |                                                                       |            |             |                                                                            |              |
|-----------------------------------|------------------------------------------------------------------------------------------------------|---------------------------------------------------------------------------------------|-----------------------------------------------------------------------|------------|-------------|----------------------------------------------------------------------------|--------------|
|                                   |                                                                                                      | 12 h and annealing at 400 °C for 15 min.                                              |                                                                       |            |             | Rhoda mine B in 150 min UV-C                                               |              |
| Ultrasonic spray pyrolysis        | [Bi <sub>38</sub> O <sub>45</sub> (OMc) <sub>24</sub> (DMSO) <sub>9</sub> ]·2DMSO·7 H <sub>2</sub> O | Deposition at 80 °C and annealing at 370 °C and 550 °C.                               | β-Bi <sub>2</sub> O <sub>3</sub>                                      | 5000-16000 | 2.34, 2.78  | ca 3.8 ppm of Rhoda mine B in 600 min under VIS light                      | <sup>5</sup> |
| Spray pyrolysis                   | Bi(CH <sub>3</sub> CO <sub>2</sub> ) <sub>3</sub>                                                    | Deposition temperature s 350-450 °C                                                   | BiO and β-Bi <sub>2</sub> O <sub>3</sub>                              | NR         | 2.6         | ca 0.24 and 0.18 ppm of MO in 180 min under UV and VIS light, respectively | <sup>6</sup> |
| Photochemical solution deposition | Metal complex of Bi(III) and N-methyldiethanolamine                                                  | Dried at 150 °C for 10 min and heated at 250 °C with UV-irradiation.                  | β-Bi <sub>2</sub> O <sub>3</sub> and δ-Bi <sub>2</sub> O <sub>3</sub> | 50         | 3.0         | ca 3 ppb MB in 250 min under UV-A.                                         | <sup>7</sup> |
| Sputtering                        | α-Bi <sub>2</sub> O <sub>3</sub> target                                                              | Room temperature at 6.5x10 <sup>-4</sup> Pa at argon and oxygen atmosphere            | δ- Bi <sub>2</sub> O <sub>3</sub>                                     | 450        | 2.0         | ca 2 ppm MO in 180 min under UV.                                           | <sup>8</sup> |
| Sputtering                        | Bismuth target                                                                                       | Room temperature at 2.2x10 <sup>-2</sup> mbar pressure at argon and oxygen atmosphere | Metallic bismuth and α-Bi <sub>2</sub> O <sub>3</sub>                 | NR         | 3.41 - 4.39 | ca 17 ppm of MO in 240 min under Xenon lamp                                | <sup>9</sup> |

NR – not reported.

### Preliminary photocatalysis tests

To ensure that the decrease of the MO concentration on  $\text{Bi}_2\text{O}_3$  thin films is due to the photocatalysis, the photolysis and adsorption experiments were performed (Fig S1).

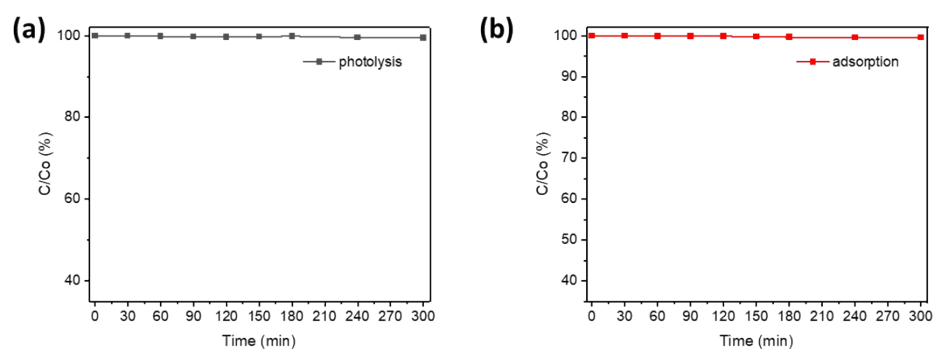

**Fig S1** UV-A direct photolysis (a) and adsorption test on the  $\text{Bi}_2\text{O}_3$  film deposited at 300 °C and annealed at 350 °C (b)

In the first experiment (Fig S1 a), 10 ppm MO solution was irradiated with UV-A lamp for 3 hours in the absence of the photocatalyst. In the second experiment (Fig S1 b), 10 ppm MO solution with  $\text{Bi}_2\text{O}_3$  thin film was kept in the dark. No direct photolysis or adsorption were detected after 3 hours of measurements ( $\eta \leq 1\%$ ).

### Optimisation of precursor molarity

Bismuth (III) acetate is insoluble in water or ethanol; however, is soluble in acetic acid. Thus, 20% alcoholic solution was used for precursor preparation. To optimise the molarity of the precursor solution,  $\text{Bi}_2\text{O}_3$  films were deposited from 0.025, 0.05 and 0.1 M bismuth (III) acetate solutions at a deposition temperature of 350 °C without annealing. The structural and optical properties of prepared  $\text{Bi}_2\text{O}_3$  films are presented in Fig S2.

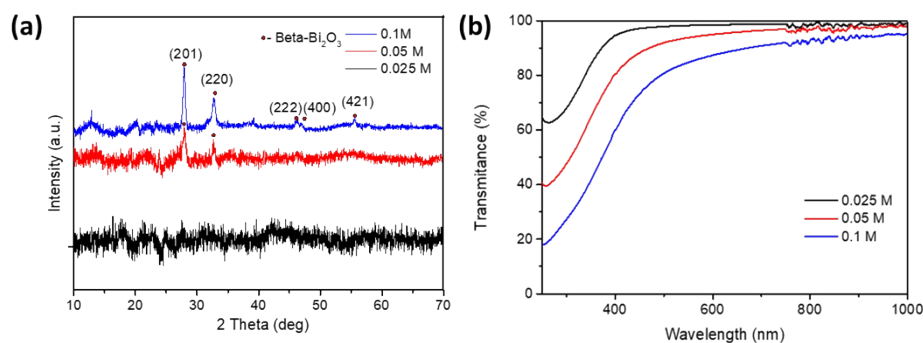

**Fig S2** The X-ray diffraction (XRD) patterns (a) and total transmittance spectra (b) of  $\text{Bi}_2\text{O}_3$  thin films prepared from different molar concentration of precursor

No peaks on the XRD pattern were detected for the sample deposited from a 0.025 M bismuth (III) acetate solution, indicating that the film was amorphous or not enough thick (Fig S2 a). The sample deposited from 0.05 M solution had two peaks of  $\beta\text{-Bi}_2\text{O}_3$  phase at 2 theta of  $27.9^\circ$  and  $32.9^\circ$  corresponding to the reflections from (201) and (220) planes, respectively (JCPDS card number 01-077-5341). Increasing the molarity to 0.1 M leads to the presence of three more peaks of  $\beta\text{-Bi}_2\text{O}_3$  at 2 theta of  $46.2^\circ$ ,  $47.1^\circ$  and  $55.6^\circ$  corresponding to the reflections from (222), (400) and (421) planes, respectively (JCPDS card number 01-077-5341). The resulting films are polycrystalline.

Total transmittance spectra (Fig S2 b) reveal that films are transparent in the visible light spectrum. The transmittance in the visible light region decreased from 97% to 87% with the precursor concentration increase. It indicates that the films become thicker and more light is absorbed. The band gap values of the films deposited from 0.025, 0.05 and 0.1 M solutions were 3.5, 3.4 and 3.2 eV, respectively. The degradation curves of photocatalytic oxidation of 10 ppm MO under UV-A are presented in Fig S3.

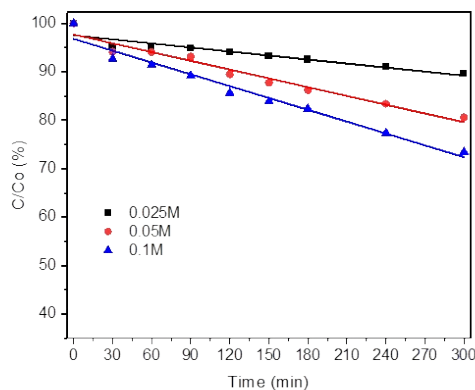

**Fig S3** Degradation curves of methyl orange (MO) oxidation under UV-A irradiation on  $\text{Bi}_2\text{O}_3$  films prepared from different molar concentration of precursor

It was observed that a higher molarity of the precursor solution led to higher photocatalytic activity. The degradation efficiency after 5 h under UV-A increased from 10% to 27% with the increase in precursor molarity from 0.025 to 0.1 M. However, further increase of molarity to 0.2 M resulted in incomplete solubility of bismuth (III) acetate in the solvent, which means that the concentration of acetic acid in solvent should be increased. Thus, the precursor concentration of 0.1 M was fixed for further experiments.

#### The effect of deposition temperature on the optical properties of $\text{Bi}_2\text{O}_3$ films

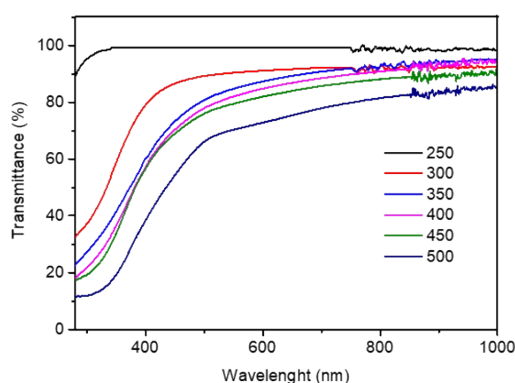

**Fig S4** Total transmittance spectra of as-deposited  $\text{Bi}_2\text{O}_3$  thin films prepared at different deposition temperatures

## The effect of visible light on MO oxidation on Bi<sub>2</sub>O<sub>3</sub> films

The photocatalytic activity of the samples deposited at 300-450 °C and deposited at 300 °C with further annealed at 350-400 °C was studied under VIS light. The degradation on 10 ppm MO on Bi<sub>2</sub>O<sub>3</sub> films is presented in Fig S5.

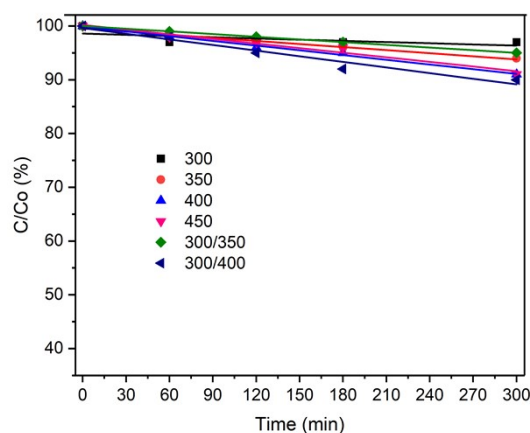

**Fig S5** Degradation curves of methyl orange (MO) oxidation under VIS irradiation on Bi<sub>2</sub>O<sub>3</sub> films prepared at different deposition and annealing temperatures

## References

- 1 P. H. E. Falsetti, F. C. Soares, G. N. Rodrigues, D. M. S. Del Duque, W. R. de Oliveira, B. F. Gianelli and V. R. de Mendonça, *Mater. Today Commun.*, 2021, **27**, 102214, DOI:10.1016/j.mtcomm.2021.102214.
- 2 T. N. Soitah, Y. Chunhui, Y. Yong, N. Yinghua and S. Liang, *Curr. Appl. Phys.*, 2010, **10**, 1372-1377, DOI:10.1016/j.cap.2010.04.006.
- 3 H. Weidong, Q. Wei, W. Xiaohong, D. Xianbo, C. Long and J. Zhaohua, *Thin Solid Films*, 2007, **515**, 5362-5365, DOI:10.1016/j.tsf.2007.01.031.
- 4 K. Brezesinski, R. Ostermann, P. Hartmann, J. Perlich and T. Brezesinski, *Chem. Mater.*, 2010, **22**, 3079-3085, DOI:10.1021/cm903780m.
- 5 M. Hofmann, L. Rößner, M. Armbrüster and M. Mehring, *ChemistryOpen*, 2020, **9**, 277-284, DOI:10.1002/open.201900323.
- 6 K. Barrera-Mota, M. Bizarro, M. Castellino, A. Tagliaferro, A. Hernández and S. E. Rodil, *Photochem. Photobiol. Sci.*, 2015, **14**, 1110-1119, DOI:10.1039/c4pp00367e.
- 7 D. Pérez-Mezcua, I. Bretos, R. Jiménez, J. Ricote, R. J. Jiménez-Rioboó, C. G. Da Silva, D. Chateigner, L. Fuentes-Cobas, R. Sirera and M. L. Calzada, *Sci. Rep.*, 2016, **6**, 39561, DOI:10.1038/srep39561.

- 8 J. C. Medina, M. Bizarro, P. Silva-Bermudez, M. Giorcelli, A. Tagliaferro and S. E. Rodil, *Thin Solid Films*, 2016, **612**, 72-81, DOI:10.1016/j.tsf.2016.05.034.
- 9 S. Ibrahim, P. Bonnet, M. Sarakha, C. Caperaa, G. Monier and A. Bousquet, *Mater. Chem. Phys.*, 2020, **243**, 122580, DOI:10.1016/j.matchemphys.2019.122580.
